# Supplementary material
Source: bioRxiv or medRxiv preprint supplement (https://medrxiv.org/highwire/filestream/82890/field_highwire_adjunct_files/0/2020.05.19.20107110-1.pdf)
Supplement: Supplementary file [file 2020.05.19.20107110-1.pdf]

## Supplement

### Impact of Proactive Integrated Care on Chronic Obstructive Pulmonary Disease

Patricia B. Koff, RRT, MEd<sup>1\*</sup>, Sung-joon Min, PhD<sup>2\*</sup>, Debora L. P. Diaz<sup>1</sup>, Tammie J. Freitag, RN, BSN<sup>1</sup>, Shannon S. James, RN, BSN<sup>1</sup>, Norbert F. Voelkel, MD<sup>1</sup>, Derek J. Linderman, MD<sup>1</sup>, Fernando Diaz del Valle, MD<sup>1</sup>, Richard K. Albert MD<sup>1</sup>, Todd M. Bull MD<sup>1</sup>, Arne Beck, PhD<sup>3</sup>, Thomas J. Stelzner, MD<sup>3</sup>, Debra P. Ritzwoller, PhD<sup>3</sup>, Christine M. Kveton, RRT<sup>3</sup>, Stephanie Carwin, RRT<sup>3</sup>, Moumita Ghosh, PhD<sup>4</sup>, Robert L. Keith, MD<sup>1, 5</sup>; John M. Westfall, MD<sup>6</sup> and R. William Vandivier, MD<sup>1</sup>.

<sup>1</sup>Division of Pulmonary Sciences and Critical Care Medicine, Colorado Pulmonary Outcomes Research Group (CPOR) and <sup>2</sup>Division of Health Care Policy and Research, Department of Medicine, University of Colorado Denver, Anschutz Medical Campus, Aurora, CO; <sup>3</sup>Institute for Health Research, Kaiser Permanente Colorado, Denver, Colorado; <sup>4</sup>National Jewish Health, Denver, CO, <sup>5</sup>Denver Veterans Administration Medical Center, Denver, Colorado; <sup>6</sup>Department of Family Medicine, High Plains Research Network, University of Colorado Denver, Anschutz Medical Campus.

\*Authors contributed equally to the study.

#### TABLES

**Supplementary Table 1. Completers Versus Non-Completers\***

| Characteristics                              | Non-Completers<br>N = 122 | Completers<br>N = 389 |
|----------------------------------------------|---------------------------|-----------------------|
| Age, yr                                      | 68.0 (9.8)                | 68.4 (8.6)            |
| Gender, % female                             | 41.0                      | 38.8                  |
| <b>Race &amp; Ethnicity</b>                  |                           |                       |
| Caucasian, %                                 | 87.7                      | 92.8                  |
| Non-Caucasian, %                             | 12.3                      | 7.2                   |
| BMI                                          | 26.4 (5.4)                | 26.4 (6.0)            |
| FEV <sub>1</sub> , % predicted               | 36.9 (13.7)               | 36.7 (13.4)           |
| mMRC dyspnea score                           | 2.0 (1.0)                 | 1.9 (1.0)             |
| Six minute walk distance, m                  | 255.7 (117.5)             | 274.9 (116.2)         |
| BODE index                                   | 4.9 (2.1)                 | 4.7 (2.0)             |
| Current smoker, %                            | 32.0                      | 17.7                  |
| Smoking history, pack-yr                     | 56.8 (31.4)               | 58.9 (33.3)           |
| Current or prior pulmonary rehabilitation, % | 21.3                      | 35.7                  |
| Lives alone, %                               | 27.0                      | 30.1                  |
| Education, yr                                | 13.0 (2.5)                | 13.5 (2.5)            |
| Influenza vaccination, %                     | 89.3                      | 94.3                  |
| Pneumococcal vaccination, %                  | 76.2                      | 83.8                  |
| Long-term O <sub>2</sub> therapy, %          | 82.0                      | 81.5                  |
| Resting O <sub>2</sub> , L                   | 1.8 (1.5)                 | 1.8 (1.6)             |

|                                                       |             |             |
|-------------------------------------------------------|-------------|-------------|
| Post-exercise O <sub>2</sub> , L                      | 2.5 (2.1)   | 2.7 (2.0)   |
| Sleep O <sub>2</sub> , L                              | 2.1 (1.3)   | 2.1 (1.5)   |
| Resting SpO <sub>2</sub> , %                          | 93.3 (2.9)  | 92.7 (2.9)  |
| Post-exercise SpO <sub>2</sub> , %                    | 87.6 (5.4)  | 87.8 (4.9)  |
| <b>Medications</b>                                    |             |             |
| SABA, %                                               | 90.2        | 92.3        |
| LABA, %                                               | 54.1        | 56.0        |
| SAMA, %                                               | 54.1        | 40.1        |
| LAMA, %                                               | 39.3        | 46.5        |
| ICS, %                                                | 63.1        | 72.2        |
| Theophylline, %                                       | 4.1         | 9.0         |
| <b>Co-morbidities</b>                                 |             |             |
| Hypertension, %                                       | 54.9        | 56.3        |
| Congestive heart failure, %                           | 27.9        | 15.4        |
| Diabetes, %                                           | 16.4        | 15.2        |
| Obstructive sleep apnea, %                            | 16.4        | 16.5        |
| <b>Prior year healthcare utilization (COPD)</b>       |             |             |
| ED visits, visits/patient                             | 1.07 (1.91) | 0.58 (1.20) |
| Hospitalizations, visits/patient                      | 0.79 (1.53) | 0.42 (1.07) |
| ICU hospitalizations, visits/patient                  | 0.19 (0.54) | 0.10 (0.41) |
| ICU hospitalizations with ventilation, visits/patient | 0.15 (0.57) | 0.07 (0.32) |
| Hospital LOS, days                                    | 3.70 (7.75) | 1.97 (5.36) |
| Urgent office visits, visits/patient                  | 1.17 (2.45) | 0.99 (1.99) |
| <b>Prior year healthcare utilization (non-COPD)</b>   |             |             |
| ED visits, visits/patient                             | 0.18 (0.56) | 0.21 (0.52) |
| Hospitalizations, visits/patient                      | 0.15 (0.49) | 0.13 (0.40) |
| Hospital LOS, days                                    | 0.64 (2.71) | 0.61 (2.71) |
| Urgent office visits, visits/patient                  | 0.39 (1.31) | 0.25 (0.65) |
| <b>SGRQ Scores</b>                                    |             |             |
| Total                                                 | 49.3 (16.8) | 47.7 (16.4) |
| Symptom                                               | 57.2 (21.2) | 56.0 (21.0) |
| Activity                                              | 67.4 (20.4) | 67.6 (19.7) |
| Impact                                                | 36.5 (19.0) | 33.7 (17.2) |

\*The only significant differences in baseline characteristics between the two groups were the proportion of patients who were current smokers ( $p = 0.0008$ ), had been treated with pulmonary rehabilitation ( $p = 0.003$ ), used short-acting muscarinic antagonists ( $p = 0.007$ ), had congestive heart failure ( $p = 0.002$ ), and measures of education ( $p = 0.04$ ), resting SpO<sub>2</sub>, % ( $p = 0.049$ ), and prior year COPD-related emergency department visits ( $p = 0.003$ ), hospitalizations ( $p = 0.002$ ), ICU hospitalizations ( $p = 0.03$ ) and hospital length of stay ( $p = 0.002$ ). Data are presented as mean (SD) unless otherwise stated.

*Definition of abbreviations:* mMRC = modified medical research council, 6MWD = 6 minute walk distance, LAMA = long-acting muscarinic antagonist, SAMA = short-acting muscarinic antagonist, LABA = long-acting beta-agonist, ICS = inhaled corticosteroid, ED = emergency department, ICU = intensive care unit, LOS = length of stay, SGRQ = St. Georges Respiratory Questionnaire

T-tests (or Wilcoxon tests) were used for continuous variables and chi-square tests (or Fisher's exact tests) were used for categorical variables.

**Supplementary Table 2. Baseline Characteristics for Completers\***

| <b>Characteristics</b>                                | <b>Usual Care<br/>N = 140</b> | <b>Proactive iCare<br/>N = 249</b> |
|-------------------------------------------------------|-------------------------------|------------------------------------|
| Age, yr                                               | 68.8 (9.0)                    | 68.2 (8.5)                         |
| Gender, % female                                      | 32.9                          | 42.2                               |
| <b>Race &amp; Ethnicity</b>                           |                               |                                    |
| Caucasian, %                                          | 93.6                          | 92.4                               |
| Non-Caucasian, %                                      | 6.4                           | 7.6                                |
| BMI, units                                            | 26.1 (5.4)                    | 26.6 (6.3)                         |
| FEV <sub>1</sub> , % predicted                        | 37.5 (14.2)                   | 36.3 (13.0)                        |
| mMRC dyspnea score, units                             | 1.9 (1.0)                     | 1.9 (1.0)                          |
| Six minute walk distance, m                           | 276.8 (128.3)                 | 273.8 (109.1)                      |
| BODE index, units                                     | 4.6 (2.1)                     | 4.8 (2.0)                          |
| Current smoker, %                                     | 16.4                          | 18.5                               |
| Smoking history, pack-yr                              | 56.4 (34.6)                   | 58.6 (32.6)                        |
| Current or prior pulmonary rehabilitation, %          | 31.4                          | 38.2                               |
| Lives alone, %                                        | 28.6                          | 30.9                               |
| Education, yr                                         | 13.5 (2.6)                    | 13.5 (2.5)                         |
| Influenza vaccination, %                              | 94.3                          | 94.4                               |
| Pneumococcal vaccination, %                           | 87.1                          | 81.9                               |
| Long-term O <sub>2</sub> therapy, %                   | 76.4                          | 84.3                               |
| Resting O <sub>2</sub> , L                            | 1.8 (1.7)                     | 1.8 (1.6)                          |
| Post-exercise O <sub>2</sub> , L                      | 2.5 (2.0)                     | 2.8 (2.0)                          |
| Sleep O <sub>2</sub> , L                              | 2.0 (1.5)                     | 2.2 (1.5)                          |
| Resting SpO <sub>2</sub> , %                          | 92.6 (2.4)                    | 92.8 (3.2)                         |
| Post-exercise SpO <sub>2</sub> , %                    | 87.9 (4.7)                    | 87.7 (5.1)                         |
| <b>Medications</b>                                    |                               |                                    |
| SABA, %                                               | 90.7                          | 93.2                               |
| LABA, %                                               | 50.0                          | 59.4                               |
| SAMA, %                                               | 49.3                          | 34.9                               |
| LAMA, %                                               | 38.6                          | 51.0                               |
| ICS, %                                                | 63.6                          | 77.1                               |
| Theophylline, %                                       | 9.3                           | 8.8                                |
| <b>Co-morbidities</b>                                 |                               |                                    |
| Hypertension, %                                       | 55.7                          | 56.6                               |
| Congestive heart failure, %                           | 18.6                          | 13.7                               |
| Diabetes, %                                           | 14.3                          | 15.7                               |
| Obstructive sleep apnea, %                            | 12.9                          | 18.5                               |
| <b>Prior year healthcare utilization (COPD)</b>       |                               |                                    |
| ED visits, visits/patient                             | 0.47 (1.19)                   | 0.63 (1.20)                        |
| Hospitalizations, visits/patient                      | 0.34 (0.79)                   | 0.47 (1.19)                        |
| ICU hospitalizations, visits/patient                  | 0.08 (0.42)                   | 0.12 (0.41)                        |
| ICU hospitalizations with ventilation, visits/patient | 0.07 (0.39)                   | 0.07 (0.27)                        |
| Hospital LOS, days                                    | 1.64 (4.57)                   | 2.17 (5.76)                        |
| Urgent office visits, visits/patient                  | 0.67 (1.15)                   | 1.16 (2.32)                        |
| <b>Prior year healthcare utilization (non-</b>        |                               |                                    |

**COPD)**

|                                      |             |             |
|--------------------------------------|-------------|-------------|
| ED visits, visits/patient            | 0.23 (0.57) | 0.20 (0.49) |
| Hospitalizations, visits/patient     | 0.13 (0.38) | 0.12 (0.41) |
| Hospital LOS, days                   | 0.46 (1.76) | 0.69 (3.12) |
| Urgent office visits, visits/patient | 0.26 (0.68) | 0.25 (0.63) |

**SGRQ Scores**

|          |             |             |
|----------|-------------|-------------|
| Total    | 45.4 (18.2) | 48.9 (15.2) |
| Symptom  | 53.7 (22.7) | 57.3 (20.0) |
| Activity | 65.4 (21.2) | 68.8 (18.7) |
| Impact   | 31.5 (18.9) | 35.0 (16.1) |

---

\*The only significant differences in baseline characteristics between the two trial groups were the proportion of patients using short-acting muscarinic antagonists ( $p = 0.006$ ), long-acting muscarinic antagonists ( $p = 0.02$ ) or inhaled corticosteroids ( $p = 0.004$ ), and prior year COPD-related emergency department visits ( $p = 0.03$ ) and urgent office visits ( $p = 0.03$ ). Data are presented as mean (SD) unless otherwise stated.

*Definition of abbreviations:* mMRC = modified medical research council, 6MWD = 6 minute walk distance, LAMA = long-acting muscarinic antagonist, SAMA = short-acting muscarinic antagonist, LABA = long-acting beta-agonist, ICS = inhaled corticosteroid, ED = emergency department, ICU = intensive care unit, LOS = length of stay, SGRQ = St. Georges Respiratory Questionnaire

T-tests (or Wilcoxon tests) were used for continuous variables and chi-square tests (or Fisher's exact tests) were used for categorical variables.

**Supplementary Table 3. Comparison of Urban and Rural Baseline Differences\***

| <b>Characteristics</b>                                | <b>Urban<br/>N = 403</b> | <b>Rural<br/>N = 108</b> |
|-------------------------------------------------------|--------------------------|--------------------------|
| Age, yr                                               | 68.3 (9.0)               | 68.4 (8.8)               |
| Gender, % female                                      | 39.2                     | 39.8                     |
| <b>Race &amp; Ethnicity</b>                           |                          |                          |
| Caucasian, %                                          | 90.8                     | 94.4                     |
| Non-Caucasian, %                                      | 9.2                      | 5.6                      |
| BMI, units                                            | 26.5 (5.9)               | 26.3 (5.8)               |
| FEV <sub>1</sub> , % predicted                        | 36.7 (13.1)              | 37.1 (14.8)              |
| mMRC dyspnea score, units                             | 1.9 (0.9)                | 1.9 (1.1)                |
| Six minute walk distance, m                           | 272.9 (115.0)            | 261.0 (123.1)            |
| BODE index, units                                     | 4.7 (2.0)                | 4.8 (2.3)                |
| Current smoker, %                                     | 19.6                     | 26.9                     |
| Smoking history, pack-yr                              | 58.1 (32.6)              | 59.5 (33.9)              |
| Current or prior pulmonary rehabilitation, %          | 35.7                     | 19.4                     |
| Lives alone, %                                        | 26.8                     | 38.9                     |
| Education, yr                                         | 13.6 (2.3)               | 12.5 (3.0)               |
| Influenza vaccination, %                              | 94.3                     | 88.9                     |
| Pneumococcal vaccination, %                           | 81.9                     | 82.4                     |
| Long-term O <sub>2</sub> therapy, %                   | 82.4                     | 78.7                     |
| Resting O <sub>2</sub> , L                            | 1.8 (1.6)                | 1.7 (1.5)                |
| Post-exercise O <sub>2</sub> , L                      | 2.7 (2.0)                | 2.3 (1.9)                |
| Sleep O <sub>2</sub> , L                              | 2.2 (1.4)                | 2.0 (1.5)                |
| Resting SpO <sub>2</sub> , %                          | 93.0 (2.6)               | 92.5 (3.8)               |
| Post-exercise SpO <sub>2</sub> , %                    | 87.8 (4.9)               | 87.5 (5.5)               |
| <b>Medications</b>                                    |                          |                          |
| SABA, %                                               | 93.5                     | 85.2                     |
| LABA, %                                               | 56.1                     | 53.7                     |
| SAMA, %                                               | 46.9                     | 30.6                     |
| LAMA, %                                               | 44.4                     | 46.3                     |
| ICS, %                                                | 71.7                     | 63.9                     |
| Theophylline, %                                       | 7.9                      | 7.4                      |
| <b>Co-morbidities</b>                                 |                          |                          |
| Hypertension, %                                       | 56.3                     | 54.6                     |
| Congestive heart failure, %                           | 17.1                     | 23.1                     |
| Diabetes, %                                           | 16.1                     | 13.0                     |
| Obstructive sleep apnea, %                            | 15.1                     | 21.3                     |
| <b>Prior year healthcare utilization (COPD)</b>       |                          |                          |
| ED visits, visits/patient                             | 0.69 (1.35)              | 0.69 (1.64)              |
| Hospitalizations, visits/patient                      | 0.49 (1.00)              | 0.59 (1.77)              |
| ICU hospitalizations, visits/patient                  | 0.14 (0.49)              | 0.05 (0.21)              |
| ICU hospitalizations with ventilation, visits/patient | 0.10 (0.43)              | 0.04 (0.19)              |
| Hospital LOS, days                                    | 2.33 (5.74)              | 2.60 (7.12)              |
| Urgent office visits, visits/patient                  | 1.04 (1.99)              | 0.98 (2.50)              |
| <b>Prior year healthcare utilization (non-</b>        |                          |                          |

**COPD)**

|                                      |             |             |
|--------------------------------------|-------------|-------------|
| ED visits, visits/patient            | 0.18 (0.47) | 0.28 (0.69) |
| Hospitalizations, visits/patient     | 0.12 (0.36) | 0.17 (0.59) |
| Hospital LOS, days                   | 0.50 (2.20) | 1.04 (4.06) |
| Urgent office visits, visits/patient | 0.32 (0.92) | 0.16 (0.53) |

**SGRQ Scores**

|          |             |             |
|----------|-------------|-------------|
| Total    | 48.1 (16.4) | 47.8 (16.9) |
| Symptom  | 55.6 (21.4) | 59.0 (19.7) |
| Activity | 68.2 (19.5) | 65.1 (21.0) |
| Impact   | 34.3 (17.7) | 34.6 (17.8) |

---

\*The only significant differences in baseline characteristics between the two groups were the proportion of patients who had been treated with pulmonary rehabilitation ( $p = 0.001$ ), living alone ( $p = 0.01$ ), influenza vaccination ( $p = 0.048$ ), use of short-acting beta-agonists ( $p = 0.005$ ) or short-acting muscarinic antagonists ( $p = 0.002$ ), measures of education ( $p = 0.0003$ ), post-exercise  $O_2$  (0.04), and prior year non-COPD-related urgent office visits ( $p = 0.03$ ). Data are presented as mean (SD) unless otherwise stated.

*Definition of abbreviations:* mMRC = modified medical research council, 6MWD = 6 minute walk distance, LAMA = long-acting muscarinic antagonist, SAMA = short-acting muscarinic antagonist, LABA = long-acting beta-agonist, ICS = inhaled corticosteroid, ED = emergency department, ICU = intensive care unit, LOS = length of stay, SGRQ = St. Georges Respiratory Questionnaire

T-tests (or Wilcoxon tests) were used for continuous variables and chi-square tests (or Fisher's exact tests) were used for categorical variables.

**Supplementary Table 4. Urban Baseline Characteristics\***

| <b>Characteristics</b>                                | <b>Usual Care<br/>N = 130</b> | <b>Proactive iCare<br/>N = 273</b> |
|-------------------------------------------------------|-------------------------------|------------------------------------|
| Age, yr                                               | 68.1 (9.5)                    | 68.4 (8.7)                         |
| Gender, % female                                      | 32.3                          | 42.5                               |
| <b>Race &amp; Ethnicity</b>                           |                               |                                    |
| Caucasian, %                                          | 92.3                          | 90.1                               |
| Non-Caucasian, %                                      | 7.7                           | 9.9                                |
| BMI, units                                            | 26.0 (5.4)                    | 26.7 (6.1)                         |
| FEV <sub>1</sub> , % predicted                        | 36.7 (14.3)                   | 36.7 (12.6)                        |
| mMRC dyspnea score, units                             | 1.9 (0.9)                     | 2.0 (0.9)                          |
| Six minute walk distance, m                           | 274.2 (133.2)                 | 272.2 (105.5)                      |
| BODE index, units                                     | 4.7 (2.1)                     | 4.8 (1.9)                          |
| Current smoker, %                                     | 22.3                          | 18.3                               |
| Smoking history, pack-yr                              | 56.3 (31.9)                   | 59.0 (33.0)                        |
| Current or prior pulmonary rehabilitation, %          | 35.4                          | 35.9                               |
| Lives alone, %                                        | 24.6                          | 27.8                               |
| Education, yr                                         | 13.6 (2.3)                    | 13.7 (2.3)                         |
| Influenza vaccination, %                              | 94.6                          | 94.1                               |
| Pneumococcal vaccination, %                           | 83.9                          | 81.0                               |
| Long-term O <sub>2</sub> therapy, %                   | 76.9                          | 85.0                               |
| Resting O <sub>2</sub> , L                            | 1.9 (1.8)                     | 1.8 (1.5)                          |
| Post-exercise O <sub>2</sub> , L                      | 2.7 (2.2)                     | 2.8 (2.0)                          |
| Sleep O <sub>2</sub> , L                              | 2.2 (1.5)                     | 2.2 (1.4)                          |
| Resting SpO <sub>2</sub> , %                          | 92.7 (2.6)                    | 93.2 (2.7)                         |
| Post-exercise SpO <sub>2</sub> , %                    | 88.0 (4.5)                    | 87.8 (5.1)                         |
| <b>Medications</b>                                    |                               |                                    |
| SABA, %                                               | 92.3                          | 94.1                               |
| LABA, %                                               | 51.5                          | 58.2                               |
| SAMA, %                                               | 56.2                          | 42.5                               |
| LAMA, %                                               | 36.2                          | 48.4                               |
| ICS, %                                                | 63.9                          | 75.5                               |
| Theophylline, %                                       | 10.0                          | 7.0                                |
| <b>Co-morbidities</b>                                 |                               |                                    |
| Hypertension, %                                       | 56.9                          | 56.0                               |
| Congestive heart failure, %                           | 21.5                          | 15.0                               |
| Diabetes, %                                           | 16.2                          | 16.1                               |
| Obstructive sleep apnea, %                            | 13.1                          | 16.1                               |
| <b>Prior year healthcare utilization (COPD)</b>       |                               |                                    |
| ED visits, visits/patient                             | 0.55 (1.25)                   | 0.76 (1.40)                        |
| Hospitalizations, visits/patient                      | 0.39 (0.85)                   | 0.54 (1.06)                        |
| ICU hospitalizations, visits/patient                  | 0.11 (0.45)                   | 0.16 (0.50)                        |
| ICU hospitalizations with ventilation, visits/patient | 0.09 (0.41)                   | 0.11 (0.44)                        |
| Hospital LOS, days                                    | 1.87 (4.71)                   | 2.55 (6.17)                        |
| Urgent office visits, visits/patient                  | 0.73 (1.27)                   | 1.19 (2.24)                        |
| <b>Prior year healthcare utilization (non-</b>        |                               |                                    |



**COPD)**

|                                      |             |             |
|--------------------------------------|-------------|-------------|
| ED visits, visits/patient            | 0.22 (0.56) | 0.17 (0.43) |
| Hospitalizations, visits/patient     | 0.12 (0.35) | 0.12 (0.37) |
| Hospital LOS, days                   | 0.34 (1.25) | 0.53 (2.53) |
| Urgent office visits, visits/patient | 0.25 (0.69) | 0.35 (1.02) |

**SGRQ Scores**

|          |             |             |
|----------|-------------|-------------|
| Total    | 45.6 (18.1) | 49.3 (15.5) |
| Symptom  | 53.6 (22.7) | 56.6 (20.7) |
| Activity | 65.7 (21.1) | 69.3 (18.6) |
| Impact   | 31.7 (19.2) | 35.6 (16.9) |

---

\*The only significant differences in baseline characteristics between the two trial groups were the proportion of patients using long-term oxygen therapy ( $p = 0.047$ ), short-acting muscarinic antagonists ( $p = 0.01$ ), long-acting muscarinic antagonists ( $p = 0.02$ ) or inhaled corticosteroids ( $p = 0.02$ ), and measures of prior year COPD-related urgent office visits ( $p = 0.04$ ) and the SGRQ impact score ( $p = 0.04$ ). Data are presented as mean (SD) unless otherwise stated.

*Definition of abbreviations:* mMRC = modified medical research council, 6MWD = 6 minute walk distance, LAMA = long-acting muscarinic antagonist, SAMA = short-acting muscarinic antagonist, LABA = long-acting beta-agonist, ICS = inhaled corticosteroid, ED = emergency department, ICU = intensive care unit, LOS = length of stay, SGRQ = St. Georges Respiratory Questionnaire

T-tests (or Wilcoxon tests) were used for continuous variables and chi-square tests (or Fisher's exact tests) were used for categorical variables.

**Supplementary Table 5. Baseline Characteristics for Urban Completers\***

| Characteristics                                       | Usual Care<br>N = 115 | Proactive iCare<br>N = 191 |
|-------------------------------------------------------|-----------------------|----------------------------|
| Age, yr                                               | 68.8 (9.0)            | 68.4 (8.5)                 |
| Gender, % female                                      | 31.3                  | 41.9                       |
| <b>Race &amp; Ethnicity</b>                           |                       |                            |
| Caucasian, %                                          | 94.8                  | 91.1                       |
| Non-Caucasian, %                                      | 5.2                   | 8.9                        |
| BMI, units                                            | 26.1 (5.5)            | 26.5 (6.2)                 |
| FEV <sub>1</sub> , % predicted                        | 36.0 (13.7)           | 36.4 (12.5)                |
| mMRC dyspnea score, units                             | 1.9 (0.9)             | 2.0 (0.9)                  |
| Six minute walk distance, m                           | 277.9 (130.6)         | 275.9 (106.1)              |
| BODE index, units                                     | 4.7 (2.0)             | 4.8 (1.9)                  |
| Current smoker, %                                     | 18.3                  | 14.7                       |
| Smoking history, pack-yr                              | 56.8 (33.3)           | 59.8 (32.3)                |
| Current or prior pulmonary rehabilitation, %          | 37.4                  | 41.4                       |
| Lives alone, %                                        | 26.1                  | 27.2                       |
| Education, yr                                         | 13.6 (2.4)            | 13.8 (2.3)                 |
| Influenza vaccination, %                              | 94.8                  | 94.2                       |
| Pneumococcal vaccination, %                           | 87.0                  | 82.2                       |
| Long-term O <sub>2</sub> therapy, %                   | 76.5                  | 85.9                       |
| Resting O <sub>2</sub> , L                            | 1.8 (1.8)             | 1.8 (1.5)                  |
| Post-exercise O <sub>2</sub> , L                      | 2.6 (2.1)             | 2.9 (2.0)                  |
| Sleep O <sub>2</sub> , L                              | 2.1 (1.5)             | 2.2 (1.4)                  |
| Resting SpO <sub>2</sub> , %                          | 92.6 (2.5)            | 93.0 (2.7)                 |
| Post-exercise SpO <sub>2</sub> , %                    | 87.8 (4.4)            | 87.8 (5.1)                 |
| <b>Medications</b>                                    |                       |                            |
| SABA, %                                               | 91.3                  | 95.8                       |
| LABA, %                                               | 50.4                  | 59.7                       |
| SAMA, %                                               | 53.9                  | 37.7                       |
| LAMA, %                                               | 36.5                  | 51.8                       |
| ICS, %                                                | 64.3                  | 79.6                       |
| Theophylline, %                                       | 10.4                  | 8.4                        |
| <b>Co-morbidities</b>                                 |                       |                            |
| Hypertension, %                                       | 54.8                  | 56.0                       |
| Congestive heart failure, %                           | 18.3                  | 10.5                       |
| Diabetes, %                                           | 14.8                  | 16.2                       |
| Obstructive sleep apnea, %                            | 12.2                  | 16.8                       |
| <b>Prior year healthcare utilization (COPD)</b>       |                       |                            |
| ED visits, visits/patient                             | 0.50 (1.28)           | 0.764(1.09)                |
| Hospitalizations, visits/patient                      | 0.34 (0.82)           | 0.45 (0.94)                |
| ICU hospitalizations, visits/patient                  | 0.09 (0.45)           | 0.14 (0.45)                |
| ICU hospitalizations with ventilation, visits/patient | 0.08 (0.42)           | 0.08 (0.30)                |
| Hospital LOS, days                                    | 1.63 (4.60)           | 2.04 (4.69)                |
| Urgent office visits, visits/patient                  | 0.70 (1.15)           | 1.14 (2.06)                |
| <b>Prior year healthcare utilization (non-COPD)</b>   |                       |                            |

|                                      |             |             |
|--------------------------------------|-------------|-------------|
| ED visits, visits/patient            | 0.23 (0.56) | 0.19 (0.46) |
| Hospitalizations, visits/patient     | 0.13 (0.36) | 0.13 (0.40) |
| Hospital LOS, days                   | 0.38 (1.32) | 0.69 (2.89) |
| Urgent office visits, visits/patient | 0.28 (0.72) | 0.29 (0.66) |
| <b>SGRQ Scores</b>                   |             |             |
| Total                                | 45.2 (18.3) | 49.3 (15.0) |
| Symptom                              | 53.4 (22.6) | 56.5 (20.2) |
| Activity                             | 65.4 (21.7) | 69.8 (17.9) |
| Impact                               | 31.2 (19.1) | 35.3 (16.1) |

\*The only significant differences in baseline characteristics between the two trial groups were the proportion of patients using long-term oxygen therapy ( $p = 0.04$ ), short-acting muscarinic antagonists ( $p = 0.006$ ), long-acting muscarinic antagonists ( $p = 0.009$ ) or inhaled corticosteroids ( $p = 0.003$ ), and measures of prior year COPD-related emergency department visits ( $p = 0.03$ ), urgent office visits ( $p = 0.049$ ) and the total SGRQ score ( $p = 0.047$ ). Data are presented as mean (SD) unless otherwise stated.

*Definition of abbreviations:* mMRC = modified medical research council, 6MWD = 6 minute walk distance, LAMA = long-acting muscarinic antagonist, SAMA = short-acting muscarinic antagonist, LABA = long-acting beta-agonist, ICS = inhaled corticosteroid, ED = emergency department, ICU = intensive care unit, LOS = length of stay, SGRQ = St. Georges Respiratory Questionnaire

T-tests (or Wilcoxon tests) were used for continuous variables and chi-square tests (or Fisher's exact tests) were used for categorical variables.

**Supplementary Table 6. Urban Quality of Life Measured by the St. George's Respiratory Questionnaire**

| Variable           | Usual Care Group |                |                  | Proactive iCare Group  |                |                  | Between Group Difference |                           | p-value                   |         |
|--------------------|------------------|----------------|------------------|------------------------|----------------|------------------|--------------------------|---------------------------|---------------------------|---------|
|                    | N                | Baseline Score | Time-point Score | N                      | Baseline Score | Time-point Score | Change from Baseline     | Difference                |                           |         |
| <b>Total Score</b> |                  |                |                  |                        |                |                  |                          |                           |                           |         |
| 3-mth              | 120              | 45.9<br>(17.9) | 48.3<br>(17.1)   | 2.34<br>(0.05, 4.63)   | 224            | 48.9<br>(15.1)   | 42.9<br>(15.1)           | -5.96<br>(-7.35, -4.56)   | -8.29<br>(-10.97, -5.62)  | <0.0001 |
| 6-mth              | 110              | 45.5<br>(17.9) | 47.6<br>(18.9)   | 2.14<br>(-0.49, 4.78)  | 196            | 49.4<br>(14.9)   | 41.4<br>(15.0)           | -8.05<br>(-9.63, -6.48)   | -10.20<br>(-13.26, -7.14) | <0.0001 |
| 9-mth              | 115              | 45.2<br>(18.3) | 47.4<br>(18.4)   | 2.12<br>(-0.30, 4.55)  | 191            | 49.3<br>(15.0)   | 41.6<br>(14.8)           | -7.69<br>(-9.26, -6.12)   | -9.82<br>(-12.70, -6.94)  | <0.0001 |
| <b>Symptom</b>     |                  |                |                  |                        |                |                  |                          |                           |                           |         |
| 3-mth              | 120              | 53.6<br>(22.3) | 54.3<br>(21.7)   | 0.68<br>(-2.60, 3.95)  | 224            | 56.4<br>(20.4)   | 47.5<br>(20.5)           | -8.91<br>(-11.38, -6.43)  | -9.58<br>(-13.71, -5.45)  | <0.0001 |
| 6-mth              | 110              | 53.7<br>(22.8) | 51.8<br>(22.3)   | -1.83<br>(-5.71, 2.05) | 196            | 56.0<br>(20.6)   | 45.3<br>(20.1)           | -10.66<br>(-13.40, -7.93) | -8.83<br>(-13.48, -4.19)  | <0.001  |
| 9-mth              | 115              | 53.4<br>(22.6) | 53.1<br>(21.8)   | -0.36<br>(-4.19, 3.48) | 191            | 56.5<br>(20.2)   | 46.9<br>(18.4)           | -9.57<br>(-12.47, -6.68)  | -9.22<br>(-13.97, -4.47)  | <0.001  |
| <b>Activity</b>    |                  |                |                  |                        |                |                  |                          |                           |                           |         |
| 3-mth              | 120              | 66.3<br>(20.6) | 68.7<br>(19.2)   | 2.41<br>(-0.48, 5.30)  | 224            | 69.1<br>(18.0)   | 64.6<br>(18.3)           | -4.56<br>(-6.36, -2.76)   | -6.97<br>(-10.20, -3.74)  | <0.0001 |
| 6-mth              | 110              | 65.4<br>(20.6) | 65.8<br>(21.5)   | 0.40<br>(-2.76, 3.56)  | 196            | 70.1<br>(17.8)   | 62.8<br>(18.5)           | -7.33<br>(-9.32, -5.34)   | -7.73<br>(-11.45, -4.01)  | <0.0001 |
| 9-mth              | 115              | 65.4<br>(21.7) | 65.9<br>(20.1)   | 0.49<br>(-2.35, 3.32)  | 191            | 69.8<br>(17.9)   | 62.2<br>(20.0)           | -7.53<br>(-9.51, -5.56)   | -8.02<br>(-11.37, -4.67)  | <0.0001 |
| <b>Impact</b>      |                  |                |                  |                        |                |                  |                          |                           |                           |         |
| 3-mth              | 120              | 31.9<br>(19.2) | 34.8<br>(18.3)   | 2.84<br>(0.29, 5.38)   | 224            | 35.1<br>(16.4)   | 29.2<br>(15.9)           | -5.83<br>(-7.34, -4.32)   | -8.67<br>(-11.62, -5.72)  | <0.0001 |
| 6-mth              | 110              | 31.6<br>(19.2) | 36.0<br>(19.7)   | 4.37<br>(1.43, 7.32)   | 196            | 35.5<br>(16.1)   | 28.0<br>(15.8)           | -7.50<br>(-9.31, -5.68)   | -11.87<br>(-15.31, -8.43) | <0.0001 |
| 9-mth              | 115              | 31.2<br>(19.1) | 35.0<br>(20.4)   | 3.81<br>(0.89, 6.74)   | 191            | 35.3<br>(16.1)   | 28.1<br>(15.3)           | -7.27<br>(-9.03, -5.51)   | -11.08<br>(-14.49, -7.68) | <0.0001 |

Baseline and time-point scores are presented as mean (SD), and changes and differences are presented as mean (95% CI). P-values shown for the comparison between Proactive iCare and Usual Care groups. T-tests were used.

**Supplementary Table 7. Urban Smoking, Symptoms, Exercise Capacity and Guideline-based Care**

| Measurement/<br>Treatment             | Usual Care    |               |                         | Proactive iCare |               |                         | Inter-group<br>Difference |             |
|---------------------------------------|---------------|---------------|-------------------------|-----------------|---------------|-------------------------|---------------------------|-------------|
|                                       | Baseline      | 9 Months      | Change from<br>Baseline | Baseline        | 9 Months      | Change from<br>Baseline | Difference                | p-<br>value |
| FEV <sub>1</sub> , % predicted        | 36.0 (13.7)   | 35.9 (14.3)   | -0.38<br>(-2.12, 1.37)  | 36.4 (12.5)     | 32.9 (13.0)   | -3.52<br>(-4.88, -2.16) | -3.14<br>(-5.37, -0.92)   | 0.006       |
| mMRC dyspnea<br>scale                 | 1.9 (0.9)     | 2.1 (1.0)     | 0.22<br>(0.05, 0.39)    | 2.0 (0.9)       | 1.9 (0.9)     | -0.03<br>(-0.15, 0.10)  | -0.24<br>(-0.45, -0.04)   | 0.02        |
| 6MWD, m                               | 277.9 (130.6) | 284.5 (126.8) | 4.00<br>(-16.26, 24.18) | 275.9 (106.1)   | 328.1 (132.4) | 50.27<br>(35.40, 65.14) | 46.31<br>(21.41, 71.22)   | 0.0003      |
| BODE index                            | 4.7 (2.0)     | 4.8 (2.1)     | 0.19<br>(-0.06, 0.45)   | 4.8 (1.9)       | 4.5 (2.0)     | -0.26<br>(-0.48, -0.04) | -0.45<br>(-0.79, -0.11)   | 0.009       |
| Sputum, %                             | 44.3          | 51.3          |                         | 46.6            | 40.8          |                         |                           | 0.03        |
| Post-exercise<br>SpO <sub>2</sub> , % | 87.8 (4.4)    | 87.9 (4.0)    | -0.02<br>(-0.79, 0.75)  | 87.8 (5.1)      | 89.6 (3.3)    | 1.53<br>(0.78, 2.30)    | 1.56<br>(0.49, 2.63)      | 0.005       |

Baseline and 9-month data are presented as mean (SD), and changes and differences are presented as mean (95% CI) unless otherwise stated.

*Definition of abbreviations:* mMRC = modified medical research council, 6MWD = 6 minute walk distance, LAMA = long-acting muscarinic antagonist, SAMA = short-acting muscarinic antagonist, LABA = long-acting beta-agonist, ICS = inhaled corticosteroid.

P-values shown for the comparison between Proactive iCare and Usual Care groups. T-tests were used for continuous variables, and logistic regression and chi-square tests were used for dichotomous variables.

**Supplementary Table 8. Urban Healthcare Utilization Pre-post Difference in 9-month Rate, per Patient**

| Variable                                              | Usual Care<br>N=115     | Proactive iCare<br>N=191 | Difference              | p-value |
|-------------------------------------------------------|-------------------------|--------------------------|-------------------------|---------|
| <b>COPD Healthcare</b>                                |                         |                          |                         |         |
| Hospitalizations, visits/patient                      | -0.08<br>(-0.24, -0.08) | -0.16<br>(-0.31, -0.02)  | -0.08<br>(-0.30, 0.14)  | 0.51    |
| ICU hospitalizations, visits/patient                  | -0.01<br>(-0.10, 0.09)  | -0.11<br>(-0.18, -0.05)  | -0.11<br>(-0.22, 0.00)  | 0.053   |
| ICU hospitalizations with ventilation, visits/patient | -0.02<br>(-0.10, 0.06)  | -0.08<br>(-0.12, -0.03)  | -0.06<br>(-0.15, 0.04)  | 0.17    |
| Hospital LOS, days                                    | -0.38*<br>(-1.51, 0.75) | -1.02<br>(-1.64, -0.40)  | -0.64<br>(-1.92, 0.64)  | 0.27    |
| ED visits, visits/patient                             | -0.18<br>(-0.38, 0.02)  | -0.30<br>(-0.47, -0.14)  | -0.12<br>(-0.39, 0.01)  | 0.12    |
| Urgent office visits, visits/patient                  | 0.15<br>(-0.10, 0.40)   | -0.62<br>(-0.99, -0.32)  | -0.77<br>(-1.16, -0.39) | <0.0001 |
| <b>Non-COPD Healthcare</b>                            |                         |                          |                         |         |
| Hospitalizations, visits/patient                      | 0.03<br>(-0.08, 0.15)   | 0.05<br>(-0.03, 0.13)    | 0.02<br>(-0.12, 0.15)   | 0.75    |
| Hospital LOS, days                                    | 0.49<br>(-0.29, 1.26)   | -0.04<br>(-0.54, 0.47)   | -0.52<br>(-1.44, 0.40)  | 0.81    |
| ED visits, visits/patient                             | -0.02<br>(-0.13, 0.10)  | 0.16<br>(0.02, 0.29)     | 0.17<br>(-0.00, 0.35)   | 0.29    |
| Urgent office visits, visits/patient                  | 0.15<br>(-0.01, 0.31)   | 0.15<br>(-0.01, 0.30)    | -0.01<br>(-0.23, 0.21)  | 0.74    |

Data are presented as mean (95% CI).

*Definition of abbreviations:* ED = emergency department, ICU = intensive care unit, LOS = length of stay.

\*Excluding one patient with pre-post difference = 195 days

P-values shown for the comparison between Proactive iCare and Usual Care groups. Wilcoxon tests were used for continuous variables.

# Supplementary Figure 1

**A**

## Total SGRQ

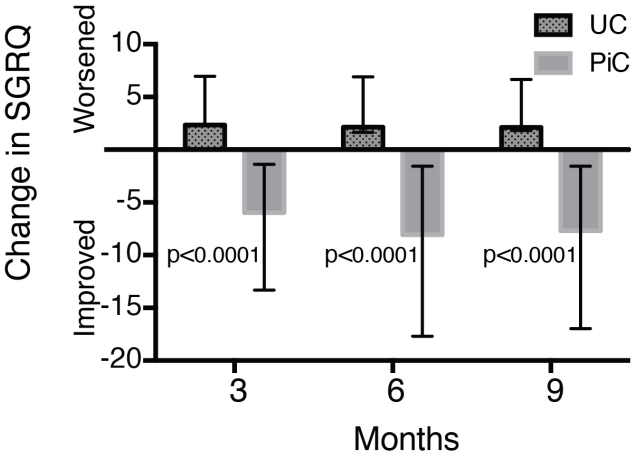

**B**

## Symptom SGRQ

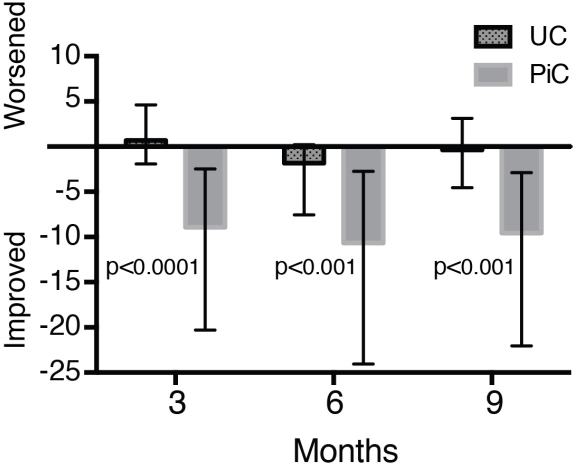

**C**

## Activity SGRQ

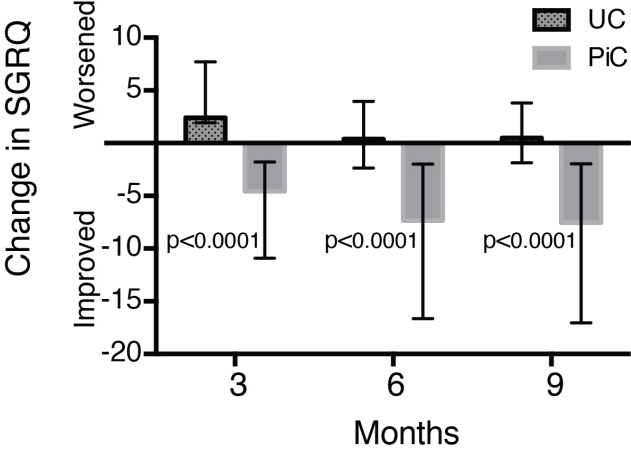

**D**

## Impact SGRQ

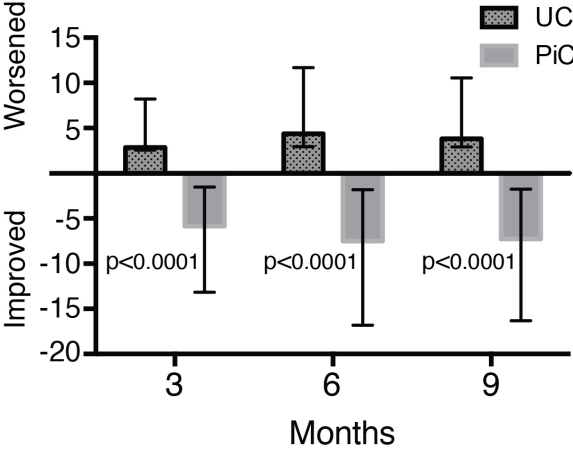

## FIGURE LEGENDS

**Supplementary Figure 1. Urban Cohort Quality of Life.** This figure shows how quality of life changed from baseline at 3, 6 and 9 months in the Usual Care (UC) and Proactive Integrated Care (PiC) groups of the urban cohort. Quality of life measured by the A) total, B) symptom, C) activity and D) impact domains of the St. George's Respiratory Questionnaire (SGRQ) are shown  $\pm$  95% CI. T-tests were used to compare differences in the change from baseline for the UC and PiC groups at each time-point.
